# Supplementary material for: Intracellular Exposure Dose-Associated Susceptibility of Steatotic Hepatocytes to Metallic Nanoparticles
Source: MDPI journal article supplement (doi:10.3390/ijms222312643), 2021-11-23
Supplement: s1 [file s1]

## Supplementary Materials

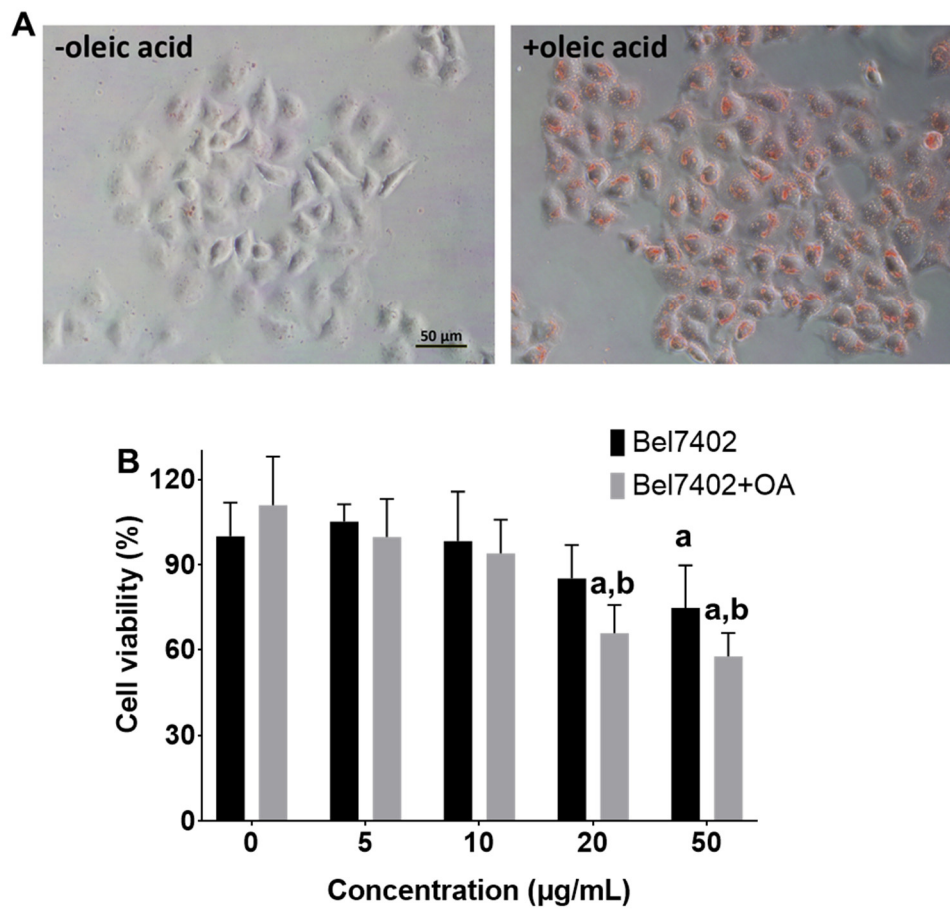

Figure S1. Susceptibility of steatotic Bel7402 cells to cytotoxicity in response to Ag NP exposures. (A) Micrograph of Bel7402 cells with oil red O staining after 24 h treatment with 0.5 mM OA. (B) Dose-dependent viability of non-steatotic and steatotic Bel7402 cells treated with Ag NPs. Data were shown as means  $\pm$  s.d.,  $n = 5$ . <sup>a</sup> $P < 0.05$ , compared with vehicle control. <sup>b</sup> $P < 0.05$ , compared with viability of non-steatotic Bel7402 cells with the same treatment.
